# Supplementary material for: A new nurse frog (Anura: Allobates) from Brazilian Amazonia with a remarkably fast multi-noted advertisement call
Source: PeerJ. 2020 Nov 4;8:e9979. doi: 10.7717/peerj.9979 (PMC7648453; doi:10.7717/peerj.9979)
Supplement: Supplemental Information 1 [file peerj-08-9979-s001.xls]

## Sheet: Table 1
Species	ID	Locality	Reference	12S	16S	28S	COI	CYTB	HH3	RAG1	RHO	SIA	TYR
Allobates algorei	TNHCFS5551	Tachira, Venezuela	Santos & Cannatella 2011	HQ290950	HQ290950			HQ290530					HQ290890
Allobates amissibilis	MTD47884	Iwokrama, Guyana	Fouquet et al. 2013	KC520679	KC520680		KC520687	KC520691					KC520696
Allobates bacurau	INPAH35406	Manicoré, Amazonas, Brazil	Simões 2016		KU195698
Allobates caeruleodactylus	MPEG13809	Castanho, Amazonas, Brazil	Grant et al. 2006	DQ502100	DQ502100		DQ502814	DQ502532	DQ502328	DQ503329	DQ503218	DQ503080
Allobates aff. tinae	MPEG13826	km 12 da AM-254, Careiro da Varzea, Amazonas, Brazil	Grant et al. 2006	DQ502099	DQ502099			DQ502531	DQ502327	DQ503328	DQ503217	DQ503079
Allobates aff. tinae	MPEG13827	km 12 da AM-254, Careiro da Varzea, Amazonas, Brazil	Grant et al. 2006	DQ502240	DQ502240			DQ502672
Allobates aff. tinae	INPH41066	km 12 da AM-254, Careiro da Varzea, Amazonas, Brazil	Present study		MT108706
Allobates carajas	INPAH38645	Serra Sul, Floresta Nacional de Carajás, Pará, Brazil	Simões et al. 2019		MK060058
Allobates carajas	INPAH38635	Serra Sul, Floresta Nacional de Carajás, Pará, Brazil	Simões et al. 2019		MK060059
Allobates chalcopis	Alca2	Montagne Pelee, Martinique	Fouquet et al. 2013	KC520677	KC520678		KC520686	KC520690
Allobates crombiei	APL13458	Altamira, Pará, Brazil	Simões et al. 2013		KF250508
Allobates femoralis	LSUMZ17552	PE Guajará-Mirim, Rondônia, Brazil	Frost et al. 2006	DQ283045	DQ283045	DQ283465		DQ502520	DQ284074	DQ503326	DQ283774	DQ282657
Allobates femoralis	OMNH36070	Porto Walter, Acre, Brazil	Grant et al. 2006	DQ502092	DQ502092		DQ502811	DQ502524	DQ502325	DQ503327	DQ503215	DQ503077	DQ503156
Allobates femoralis	QCAZ16484	Yasuni, Ecuador	Santos et al. 2003	AY364543	AY364543			HQ290531					HQ290891
Allobates ﬂaviventris	OMNH36958	PE Guajará-Mirim, Rondônia, Brazil	Grant et al. 2006	DQ502137	DQ502137			DQ502569		DQ503350	DQ503239	DQ503101
Allobates ﬂaviventris	APL14523	Cachoeira de Jirau, Porto Velho, Rondônia, Brazil	Lima et al. 2014		KJ747336
Allobates flaviventris	MTR25512	PN Serra dos Pacaás Novos, Rondônia, Brazil	Melo-Sampaio et al. 2018		KY886567			KY886609
Allobates fratisenescus	QCAZ54377	Morona Santiago, Ecuador	Grant et al. 2017		MF624172			MF614174				MF624069
Allobates gasconi	APL14410	Eirunepé, Amazonas, Brazil	Lima et al. 2014		KJ747333
Allobates gasconi	MPEG13003	Rio Ituxi, Amazonas, Brazil	Grant et al. 2006	DQ502052	DQ502052		DQ502777	DQ502483
Allobates gasconi	OMNH36636	Rio Ituxi, Amazonas, Brazil	Grant et al. 2006	DQ502209	DQ502209		DQ502898	DQ502644
Allobates gasconi	MCP13630	Feijó, Acre, Brazil	Melo-Sampaio et al. 2018		KY886577			KY886618
Allobates gasconi	MNRJ91665	Feijó, Acre, Brazil	Melo-Sampaio et al. 2018		KY886576			KY886617
Allobates granti	MC206	Saul, French Guyana	Fouquet et al. 2012		JN690186								JN691554
Allobates grillisimilis	APL12747	Borba, Amazonas, Brazil	Simões et al. 2013		KF250504
Allobates hodli	ABUE2189	Abunã, Porto Velho, Rondônia, Brazil	Simões et al. 2010		GU017423
Allobates humilis	CVULA5690	Barinas, Venezuela	Santos et al. 2014	KJ940454	KJ940454
Allobates insperatus	QCAZ16533	Yasuni, Ecuador	Santos et al. 2003	AY364557	AY364557			HQ290539					HQ290899
Allobates juami	MCP13287	Estação Ecológica Juami-Japurá, Amazonas, Brazil	Simões et al. 2018		MG243349
Allobates juami	MCP13291	Estação Ecológica Juami-Japurá, Amazonas, Brazil	Simões et al. 2018		MG243351
Allobates juanii	ARA2394	Villavicencio, Meta, Ecuador	Grant et al. 2006	DQ502271	DQ502271		DQ502933	DQ502702	DQ502401	DQ503403	DQ503277
Allobates juanii	TNHCFS4978	Villavicencio, Meta, Ecuador	Santos & Cannatella 2011	HQ290960	HQ290960			HQ290540					HQ290900
Allobates kingsburyi	QCAZ16523	Rio Chicana, Zamora Chinchipe, Ecuador	Santos & Cannatella 2011	HQ290963	HQ290963			HQ290541					HQ290901
Allobates magnussoni	MPEG11923	Curua-Uma, Pará, Brazil	Grant et al. 2006	DQ502132	DQ502132	DQ502994			DQ502348	DQ503347	DQ503237	DQ503098
Allobates masniger	APL12958	PN Amazônia, Pará, Brazil	Kaefer et al. 2013		JQ966889
Allobates nidicola	MPEG13821	Castanho, Amazonas, Brazil	Grant et al. 2006	DQ502101	DQ502101	DQ502980		DQ502533	DQ502329	DQ503330	DQ503219	DQ503081
Allobates niputidea	MUJ3520	Magdalena, Caldas, Colombia	Grant et al. 2006	DQ502272	DQ502934	DQ502272	DQ502703	DQ502402	DQ503404	DQ503278
Allobates nunciatus	INPAH40485	East bank of middle Tapajós River, Itaituba, Pará, Brazil	Moraes et al. 2019		MK680965
Allobates nunciatus	INPAH40479	East bank of middle Tapajós River, Trairão, Pará, Brazil	Moraes et al. 2019		MK680969
Allobates olfersioides	MRT6031	Sao José da Vitória	Grant et al. 2006	DQ502126	DQ502126		DQ502833	DQ502557	DQ502342		DQ503232	DQ503093
Allobates olfersioides	MNRJ79897	Rio de Janeiro, Rio de Janeiro, Brazil	Grant et al. 2017	MF624178	MF624178	MF614241		MF614175	MF624103
Allobates ornatus	MHNSM22863	Tarapoto, San Martin, Peru	Santos et al. 2009	EU342550	EU342550
Allobates pacaas	MZUSP158937	Pico do Tracoá, Parque Nacional dos Pacaás Novos, Rondonia, Brazil	Melo-Sampaio et al. 2020		MT076998
Allobates pacaas	MZUSP158938	Pico do Tracoá, Parque Nacional dos Pacaás Novos, Rondonia, Brazil	Melo-Sampaio et al. 2020		MT076999
Allobates pacaas	MZUSP158934	Pico do Tracoá, Parque Nacional dos Pacaás Novos, Rondonia, Brazil	Melo-Sampaio et al. 2020		MT077000
Allobates paleovarzensis	INPAH29176	Lago Janauacá, Amazonas, Brazil	Kaefer et al. 2013		JQ966835
Allobates pittieri	EBRG3420	PN Pittier, Venezuela	Manzanilla et al. 2009		EU380801		EU380853
Allobates subfolionidiﬁcans	APL1692	Rio Branco, Acre, Brazil	Simões et al. 2013		KF250493
Allobates subfolionidiﬁcans	MPEG12321	Porto Walter, Acre, Brazil	Grant et al. 2006	DQ502134	DQ502134	DQ502995	DQ502841	DQ502566	DQ502349	DQ503348	DQ503238	DQ503099
Allobates sumtuosus	MTD477	Mabura Hill, Guyana	Fouquet et al. 2013	KC520681	KC520682		KC520688	KC520692					KC520697
Allobates talamancae	SIUC7667	El Cope, Panama	Grant et al. 2006	DQ502166	DQ502166	DQ503004	DQ502868	DQ502601	DQ502364	DQ503363	DQ503250	DQ503114
Allobates talamancae	QCAZ16549	Carchi, Ecuador	Santos & Cannatella 2011	HQ290974	HQ290974			HQ290552					HQ290912
Allobates tapajos	LSUMZ15176	Curua-Uma, Pará, Brazil	Grant et al. 2006	DQ502046	DQ502046		DQ502772	DQ502477	DQ502310	DQ503316	DQ503201	DQ503064
Allobates tinae sensu lato	MPEG13397	PE Guajará-Mirim, Rondônia, Brazil	Grant et al. 2006	DQ502213	DQ502213		DQ502900	DQ502648
Allobates tinae sensu lato	APL17081	Tefé, Amazonas, Brazil	Melo-Sampaio et al. 2018		KY886590			KY886632
Allobates tinae sensu lato	APL17082	Tefé, Amazonas, Brazil	Melo-Sampaio et al. 2019					KY886633
Allobates tinae sensu stricto	MPEG12978	Rio Ituxi, Amazonas, Brazil	Grant et al. 2006	DQ502098	DQ502098			DQ502530
Allobates tinae sensu stricto	MNRJ90215	Boca do Acre, Amazonas, Brazil	Melo-Sampaio et al. 2018		KY886589			KY886630
Allobates tinae sensu stricto	INPH41031	RAPELD JIE, Porto Velho, Rondônia, Brasil	Present study		MT108710
Allobates trilineatus	KU215172	Cusco Amazonico, Madre de Dios, Peru	Grant et al. 2006	DQ501986	DQ501986	DQ502938	DQ502712	DQ502411	DQ502279	DQ503284	DQ503176	DQ503040
Allobates trilineatus	MJH7477	Panguana, Peru	Grant et al. 2006	DQ502118	DQ502118		DQ502826	DQ502550
Allobates trilineatus	MPEG12356	Porto Walter, Acre, Brazil	Grant et al. 2006	DQ502050	DQ502050		DQ502775	DQ502481
Allobates trilineatus	MNRJ91664	Envira, Amazonas, Brazil	Melo-Sampaio et al. 2018		KY886584		KY886601	KY886625
Allobates trilineatus	MNRJ91666	Feijó, Acre, Brazil	Melo-Sampaio et al. 2018		KY886586		KY886603	KY886627
Allobates undulatus	AMNHA159139	Cerro Yutaje, Amazonas, Venezuela	Frost et al. 2006	DQ283044	DQ283044	DQ283464	DQ502756	DQ502459	DQ284073	DQ503308	DQ283773	DQ282656
Allobates velocicantus sp. nov.	PRMS412	Cruzeiro do Sul, Acre, Brazil	Melo-Sampaio, P.R. umpublished		KY886579
Allobates velocicantus sp. nov.	MCP10188	Cruzeiro do Sul, Acre, Brazil	Grant et al. 2017		MF624181
Allobates velocicantus sp. nov.	INPAH41344	Mancio Lima, Acre, Brazil	Present study		MT446458
Allobates velocicantus sp. nov.	INPAH41345	Mancio Lima, Acre, Brazil	Present study		MT446459
Allobates velocicantus sp. nov.	INPAH41348	Mancio Lima, Acre, Brazil	Present study		MT446460
Allobates velocicantus sp. nov.	INPAH41341	Mancio Lima, Acre, Brazil	Present study		MT446461
Allobates velocicantus sp. nov.	INPAH41342	Mancio Lima, Acre, Brazil	Present study		MT446462
Allobates zaparo	QCAZ16603	Jatun Sacha, Napo, Ecuador	Santos & Cannatella 2011	HQ291003	HQ291003			HQ290580					HQ290940
Allobates zaparo	USNM546405	Coca, Ecuador	Grant et al. 2006	DQ502026	DQ502026	DQ502955	DQ502752	DQ502455	DQ502301	DQ503305	DQ503192	DQ503055
Anomaloglossus stepheni	MJH3928	Reserva Ducke, Manaus, Amazonas, Brazil	Grant et al. 2006	DQ502107	DQ502107	DQ502984
Aromobates nocturnus	AMNHA130041	Agua de Obispos	Grant et al. 2006	DQ502154	DQ502154	DQ502996
Mannophryne collaris	TNHCFS5507	El Estanquillo, Merida, Venezuela	Santos & Cannatella 2011	HQ291004	HQ291004			HQ290581					HQ290941
Rheobates palmatus	MUJ5003	La Mesa, Colombia	Grant et al. 2006	AH015828	AH015828		DQ502925	DQ502694			DQ503271		DQ503172
